# Supplementary material
Source: Royal Society of Chemistry journal article supplement (doi:10.1039/d6nr00132g)
Supplement: d6nr00132g1.pdf [file d6nr00132g1.pdf]

## Supporting Information

### Structural Stability and Interface Optimization for Enhancing High-Voltage Electrochemical Performance of $\text{LiNi}_{0.83}\text{Co}_{0.11}\text{Mn}_{0.06}\text{O}_2$ Cathode Material

Leiyong Zeng<sup>1,4</sup>, Ying Yang<sup>1,2,3</sup>, Wen Jiao<sup>1</sup>, Jian Li<sup>1</sup>, Haiyan Cai<sup>1</sup>, Long Jiang<sup>1,4</sup>, Yuqi Meng<sup>1</sup>, Gaoqiang Mao<sup>1,\*</sup>, Hui Tong<sup>1,2,3</sup>

- 1. School of Metallurgy and Environment, Central South University, Changsha 410083, P.R. China*
- 2. National & Regional Joint Engineering Research Center of Nonferrous Metal Resource Recycling, Changsha, 410083, P.R. China*
- 3. Engineering Research Center of the Ministry of Education for Advanced Battery Materials, Central South University, Changsha 410083, P.R. China*
- 4. XTC New Energy Materials (Xiamen) Co., Ltd., Xiamen 361026, P.R. China*

*\*Correspondence: gaoqiang.mao@csu.edu.cn (Gaoqiang Mao)*

KEYWORDS: structural stability, Ni-rich cathode materials, coating, high cut-off voltage

## Experimental Section

### Material Preparation

A stoichiometric mixture of  $\text{LiNO}_3$  (AR,  $\geq 99.99\%$ , Aladdin),  $\text{La}(\text{NO}_3)_3 \cdot 6\text{H}_2\text{O}$  (AR,  $\geq 99.9\%$ , Aladdin), and  $\text{H}_3\text{PO}_4$  ( $\geq 99\%$ , Aladdin) was dissolved in 20 mL of ethanol, followed by adding tetraisobutyl titanate ( $\text{C}_{16}\text{H}_{36}\text{O}_4\text{Ti}$ , AR,  $\geq 99.9\%$ , Aladdin). The Li:La:Ti:P molar ratio was 1.3:0.3:1.7:3. After continuous stirring for 1 h, a homogeneous precursor solution of  $\text{Li}_{1.3}\text{La}_{0.3}\text{Ti}_{1.7}(\text{PO}_4)_3$  was obtained.

The  $\text{Ni}_{0.83}\text{Co}_{0.11}\text{Mn}_{0.06}(\text{OH})_2$  precursor was synthesized *via* a coprecipitation method, as described in detail in previous reports <sup>1, 2</sup>. Subsequently, the obtained  $\text{Ni}_{0.83}\text{Co}_{0.11}\text{Mn}_{0.06}(\text{OH})_2$  precursor was thoroughly mixed with  $\text{LiOH} \cdot \text{H}_2\text{O}$  (AR, Aladdin) by mechanical grinding for 0.5 h, with a molar ratio of Li/(Ni + Co + Mn) set to 1.05:1. The mixture was calcined under an  $\text{O}_2$  atmosphere at 450 °C for 4 h, followed by a second calcination at 750 °C for 12 h to yield the  $\text{LiNi}_{0.83}\text{Co}_{0.11}\text{Mn}_{0.06}\text{O}_2$  cathode material, denoted as LNCM.

For surface modification, the as-prepared LNCM powder was dispersed in ethanol by ultrasonic treatment and then mixed with a pre-prepared  $\text{Li}_{1.3}\text{La}_{0.3}\text{Ti}_{1.7}(\text{PO}_4)_3$  precursor solution corresponding to a coating amount of 1.0 wt.%. After stirring at 25 °C for 6 h, the mixture was heated to 80 °C to evaporate the solvent, yielding a dried powder. The resulting powder was then calcined at 600 °C for 10 h under an argon atmosphere to form the  $\text{Li}_{1.3}\text{La}_{0.3}\text{Ti}_{1.7}(\text{PO}_4)_3$ -coated  $\text{LiNi}_{0.83}\text{Co}_{0.11}\text{Mn}_{0.06}\text{O}_2$  composite, denoted as LNCM@LLTP. A schematic illustration of this process is shown in Fig. 1a.

### Material Characterization

The crystal structures of the as-prepared samples were characterized by X-ray diffraction (XRD, PANalytical Empyrean 2) using Cu K $\alpha$  radiation. Rietveld refinement was performed using the GSAS software package to obtain detailed structural parameters. Morphological features and elemental distributions were analyzed by scanning electron microscopy (SEM, JSM-7900F) equipped with energy-dispersive X-ray spectroscopy (EDS). Transmission electron microscopy (TEM, JEM-2100F) was employed to examine the microstructure and coating thickness. The surface chemical states of elements were investigated by X-ray photoelectron spectroscopy (XPS, Thermo Scientific K-Alpha).

### **Electrochemical Measurements**

Electrochemical performance was assessed using CR2025-type coin cells. The cathode slurry was prepared by homogeneously mixing the active material, poly(vinylidene fluoride) (PVDF) binder, and Super P conductive carbon at a mass ratio of 8:1:1, using N-methyl-2-pyrrolidone (NMP) as the solvent. The slurry was uniformly coated onto a cleaned aluminum foil current collector and vacuum-dried at 120 °C for 12 h to remove residual solvent. The dried electrode was then punched into circular disks with a diameter of 12 mm.

Cell assembly was carried out in an argon-filled glovebox, employing Li metal foil as the counter and reference electrode, Celgard 2400 as the separator, and an electrolyte consisting of 1 M LiPF<sub>6</sub> dissolved in a mixed solvent of dimethyl carbonate (DMC), ethyl methyl carbonate, and ethylene carbonate (EC) (EMC) (1:1:1 v/v).

Galvanostatic charge–discharge cycling and rate performance tests were conducted

using a Land CT2001A battery testing system over a voltage window of 2.7–4.5 V (vs. Li<sup>+</sup>/Li), with 1 C defined as 200 mA·g<sup>-1</sup>. Cyclic voltammetry (CV) and electrochemical impedance spectroscopy (EIS) measurements were performed on a CHI600D electrochemical workstation. CV curves were recorded at a 0.1 mV·s<sup>-1</sup> scan rate in the 2.7–4.5 V voltage range. EIS spectra were collected over a frequency range from 100 kHz to 10 mHz with an AC perturbation amplitude of 5 mV.

**Table S1** Lattice parameters of all specimens.

| Specimen | <i>a</i> (Å) | <i>c</i> (Å) | <i>c/a</i> | Ni <sup>2+</sup> in Li Layer(%) | R <sub>p</sub> (%) | R <sub>wp</sub> (%) |
|----------|--------------|--------------|------------|---------------------------------|--------------------|---------------------|
| LNCM     | 2.87701      | 14.20624     | 4.938      | 5.89                            | 3.30               | 4.38                |
| LNCM@LLT | 2.87182      | 14.19673     | 4.940      | 2.25                            | 3.04               | 3.86                |
| P        |              |              |            |                                 |                    |                     |

**Table S2** The electrochemical impedance fitting results and calculated  $D_{Li^+}$  values.

| Specimen  | $R_s(\Omega)$ | $R_{ct}(\Omega)$ | $D_{Li^+}(\text{cm}^2\cdot\text{s}^{-1})$ |
|-----------|---------------|------------------|-------------------------------------------|
| LNCM      | 10.07         | 105.4            | $2.686\times 10^{-13}$                    |
| LNCM@LLTP | 3.025         | 33.90            | $6.665\times 10^{-13}$                    |

- [1] G. Mao, Y. Yang, W. Jiao, W. Yu, X. Yuan, Q. Tian, L. Zeng, L. Jiang, H. Tong and X. Guo, *Journal of Materials Science*, 2022, **57**, 19892-19901.
- [2] G. Mao, W. Yu, Q. Zhou, L. Li, Y. Huang, Y. Yao, D. Chu, H. Tong and X. Guo, *Applied Surface Science*, 2020, **531**, 147245.

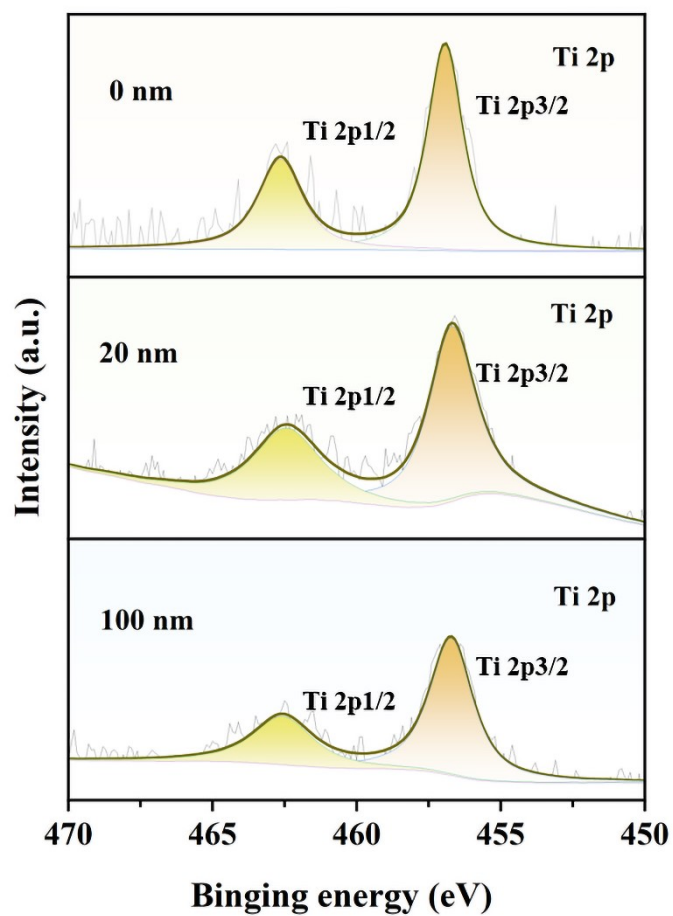

**Fig. S1** Ti 2p XPS spectra of LLTP@LNCM at different Ar<sup>+</sup> etching depths (0 nm, 20 nm, and 100 nm).

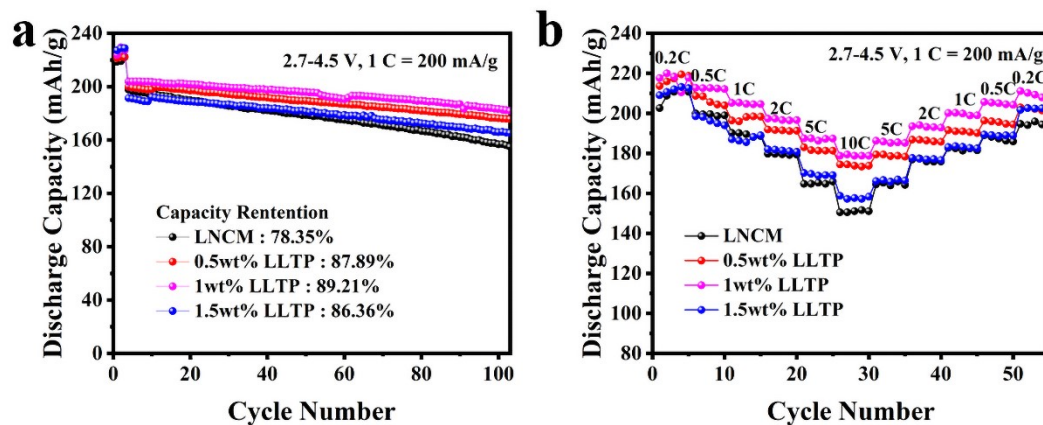

**Fig. S2** Electrochemical performance of LNCM and LLTP@LNCM with different coating amounts (0.5 wt.%, 1.0 wt.%, and 1.5 wt.%): (a) Cycling performance at 1 C between 2.7–4.5 V, with capacity retention values labeled; (b) Rate capability at various current densities (0.2 C to 10 C).

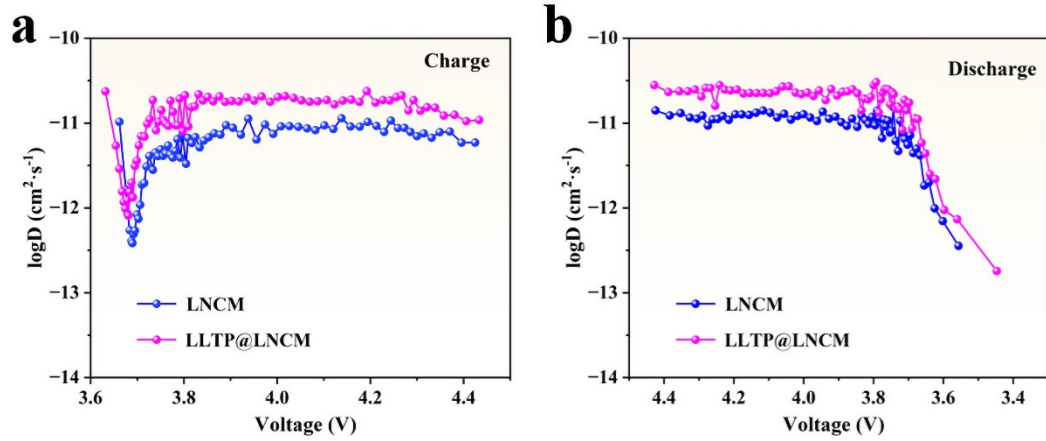

**Fig. S3** Li<sup>+</sup> diffusion coefficients as a function of voltage for LNCM and LLTP@LNCM during (a) charge and (b) discharge processes.

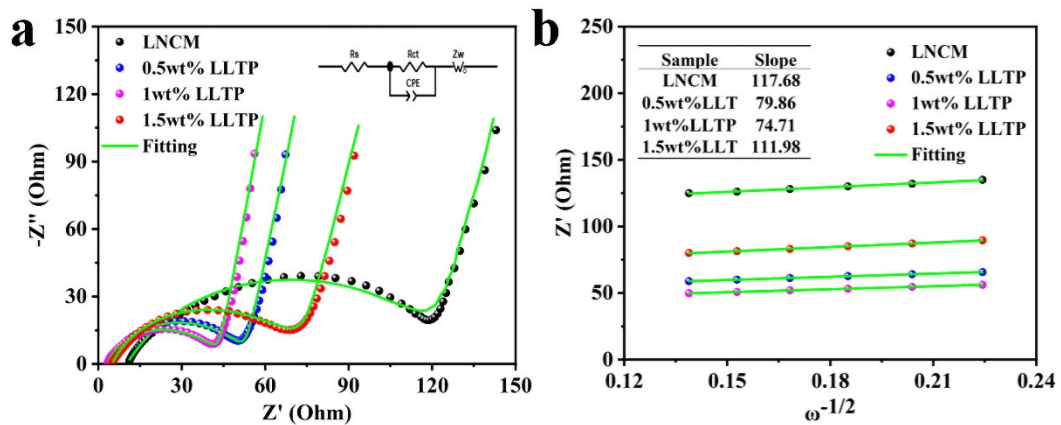

**Fig. S4** EIS of LNCM and LLTP@LNCM with different coating amounts: (a) Nyquist plots with equivalent circuit fitting; (b) Linear fitting of  $Z'$  vs.  $\omega^{-1/2}$  to extract the Warburg factor (slope), which correlates with  $\text{Li}^+$  diffusion kinetics.

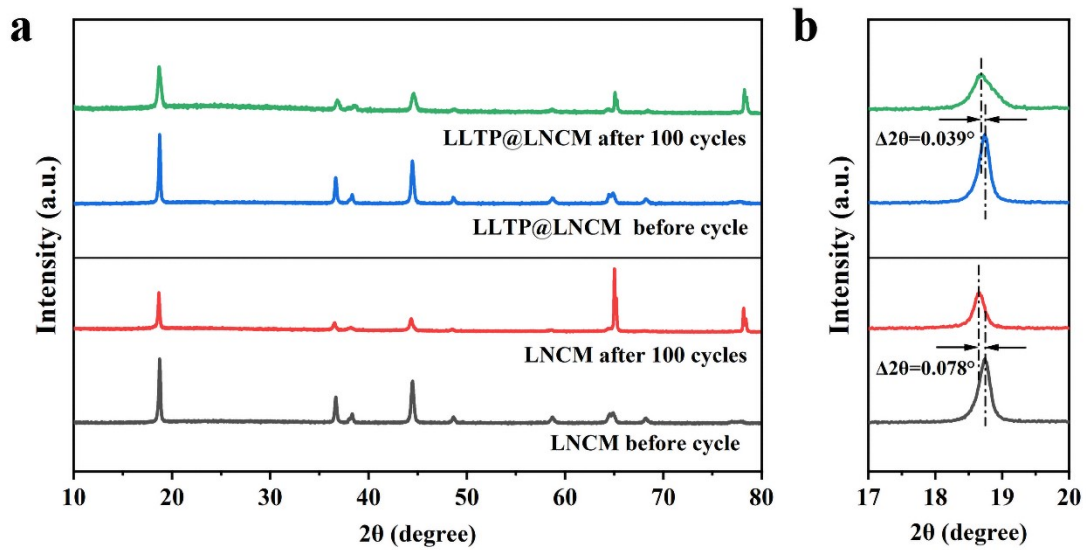

**Fig. S5** Structural stability of LNCM and LLTP@LNCM before and after 100 cycles: (a) Full XRD patterns; (b) Magnified view of the (003) peak, showing the  $2\theta$  shift ( $\Delta 2\theta$ ) induced by cycling.
